# Supplementary material for: Preparation and dielectric properties of polymer composites incorporated with polydopamine@AgNPs core–satellite particles
Source: Royal Society of Chemistry journal article supplement (doi:10.1039/c6ra00827e), 2016-01-01
Supplement: c6ra00827e1.pdf [file c6ra00827e1.pdf]

## Preparation and dielectric properties of polymer composites incorporated with polydopamine@AgNPs core-satellite particles

Liang Zhang<sup>a,\*</sup>, Ranran Gao<sup>a</sup>, Penghao Hu<sup>a</sup>, Zhi-Min Dang<sup>a,b,\*</sup>

<sup>a</sup> Department of Polymer Science and Engineering, School of Chemistry and Biological Engineering, University of Science & Technology Beijing, Beijing 100083, P.R. China.

E-mail: [zhangliang@ustb.edu.cn](mailto:zhangliang@ustb.edu.cn)

<sup>b</sup> State Key Laboratory of Power System, Department of Electrical Engineering, Tsinghua University, Beijing 100084, P.R. China. E-mail: [dangzm@tsinghua.edu.cn](mailto:dangzm@tsinghua.edu.cn)

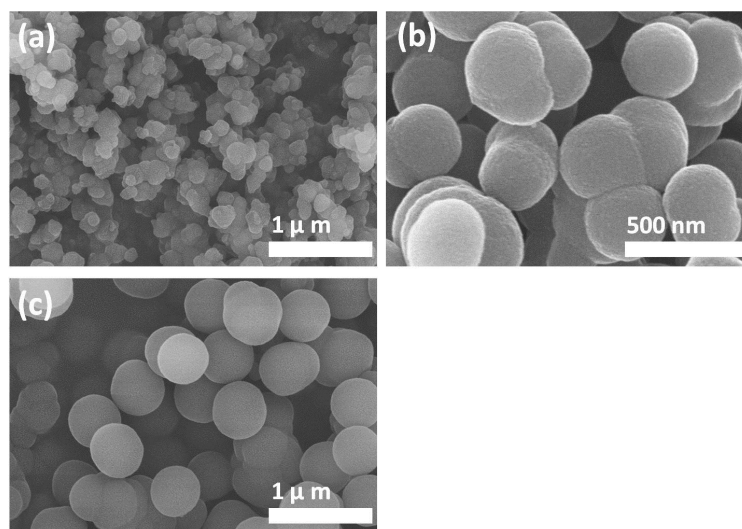

Fig. S1 SEM images of PDA particles prepared at the pH of (a) 7.5, (b) 8.0 and (c) 9.0.
